# Supplementary material for: Multi-omics analysis reveals size-dependent toxicity and vascular endothelial cell injury induced by microplastic exposurein vivoandin vitro
Source: Royal Society of Chemistry journal article supplement (doi:10.1039/d1en01067k), 2021-12-22
Supplement: d1en01067k4.pdf [file d1en01067k4.pdf]

## Figure legends

Additional file 1:

Fig. 1S. Size of MPs determined by DLS.

Fig. 2S Effect of MPs on the body weight in AS mice

Fig. 3S Effect of MPs on the CD31 level in AS mice aorta

Fig. 4S Effect of MPs on the lipid deposition in liver

Fig. 5S Effect of MPs on the LDH in ECs

Additional file 2: Fig. 6S Enriched GO terms of DEGs among of 20 nm MPs group, 10  $\mu$ m MPs group and control group.

Additional file 3: Fig. 7S Comparison of transcript expression in terms of fold change was measured by qPCR.

Additional file4: Table S1 List of the DEGs expressed between 20 nm MPs vs control, 10  $\mu$ m MPs vs control, and 20 nm MPs vs10  $\mu$ m MPs groups.

Additional file5: Table S2 The significant of GO terms of DEGs enriched between 20 nm MPs vs control, 10  $\mu$ m MPs vs control, and 20 nm MPs vs10  $\mu$ m MPs groups DEGs.
