# Supplementary material for: Multi-omics analysis reveals size-dependent toxicity and vascular endothelial cell injury induced by microplastic exposurein vivoandin vitro
Source: Royal Society of Chemistry journal article supplement (doi:10.1039/d1en01067k), 2021-12-22
Supplement: d1en01067k6.xlsx [file d1en01067k6.xlsx]

## Sheet: 基因集GO分类统计表
GO ID	Description	Term Type	B_vs_A_G num	B_vs_A_G percent	CK_vs_A_G num	CK_vs_A_G percent	CK_vs_B_G num	CK_vs_B_G percent
GO:0032501	multicellular organismal process	biological_process	466	466/2088	510	510/2423	14	14/31
GO:0065007	biological regulation	biological_process	1232	1232/2088	1424	1424/2423	21	21/31
GO:0051704	multi-organism process	biological_process	182	182/2088	219	219/2423	4	4/31
GO:0048511	rhythmic process	biological_process	31	31/2088	36	36/2423	0	0
GO:0022414	reproductive process	biological_process	148	148/2088	169	169/2423	4	4/31
GO:0040011	locomotion	biological_process	187	187/2088	217	217/2423	2	2/31
GO:0098754	detoxification	biological_process	11	11/2088	18	18/2423	0	0
GO:0000003	reproduction	biological_process	3	3/2088	2	2/2423	0	0
GO:0050896	response to stimulus	biological_process	601	601/2088	690	690/2423	12	12/31
GO:0007610	behavior	biological_process	69	69/2088	74	74/2423	1	1/31
GO:0009987	cellular process	biological_process	1443	1443/2088	1679	1679/2423	23	23/31
GO:0022610	biological adhesion	biological_process	175	175/2088	192	192/2423	5	5/31
GO:0001906	cell killing	biological_process	10	10/2088	14	14/2423	0	0
GO:0051179	localization	biological_process	491	491/2088	593	593/2423	4	4/31
GO:0032502	developmental process	biological_process	660	660/2088	748	748/2423	12	12/31
GO:0002376	immune system process	biological_process	265	265/2088	318	318/2423	4	4/31
GO:0071840	cellular component organization or biogenesis	biological_process	568	568/2088	673	673/2423	9	9/31
GO:0098743	cell aggregation	biological_process	4	4/2088	5	5/2423	1	1/31
GO:0043473	pigmentation	biological_process	6	6/2088	9	9/2423	0	0
GO:0008152	metabolic process	biological_process	775	775/2088	949	949/2423	15	15/31
GO:0008283	cell population proliferation	biological_process	87	87/2088	99	99/2423	3	3/31
GO:0023052	signaling	biological_process	89	89/2088	89	89/2423	3	3/31
GO:0040007	growth	biological_process	44	44/2088	39	39/2423	0	0
GO:0044425	membrane part	cellular_component	836	836/2088	940	940/2423	11	11/31
GO:0005623	cell	cellular_component	32	32/2088	35	35/2423	0	0
GO:0044217	other organism part	cellular_component	22	22/2088	24	24/2423	1	1/31
GO:0043226	organelle	cellular_component	1174	1174/2088	1426	1426/2423	22	22/31
GO:0044422	organelle part	cellular_component	951	951/2088	1168	1168/2423	13	13/31
GO:0032991	protein-containing complex	cellular_component	460	460/2088	581	581/2423	9	9/31
GO:0044464	cell part	cellular_component	1615	1615/2088	1901	1901/2423	26	26/31
GO:0016020	membrane	cellular_component	945	945/2088	1091	1091/2423	13	13/31
GO:0045202	synapse	cellular_component	141	141/2088	149	149/2423	2	2/31
GO:0044456	synapse part	cellular_component	116	116/2088	130	130/2423	1	1/31
GO:0009295	nucleoid	cellular_component	1	1/2088	2	2/2423	0	0
GO:0099080	supramolecular complex	cellular_component	79	79/2088	88	88/2423	0	0
GO:0031974	membrane-enclosed lumen	cellular_component	137	137/2088	184	184/2423	2	2/31
GO:0005576	extracellular region	cellular_component	345	345/2088	379	379/2423	8	8/31
GO:0044421	extracellular region part	cellular_component	465	465/2088	524	524/2423	10	10/31
GO:0030054	cell junction	cellular_component	202	202/2088	221	221/2423	2	2/31
GO:0031386	protein tag	molecular_function	1	1/2088	3	3/2423	0	0
GO:0038024	cargo receptor activity	molecular_function	14	14/2088	17	17/2423	1	1/31
GO:0005215	transporter activity	molecular_function	118	118/2088	138	138/2423	2	2/31
GO:0005488	binding	molecular_function	1596	1596/2088	1891	1891/2423	27	27/31
GO:0003824	catalytic activity	molecular_function	572	572/2088	694	694/2423	11	11/31
GO:0140104	molecular carrier activity	molecular_function	2	2/2088	3	3/2423	0	0
GO:0005198	structural molecule activity	molecular_function	118	118/2088	132	132/2423	1	1/31
GO:0098772	molecular function regulator	molecular_function	225	225/2088	245	245/2423	6	6/31
GO:0016209	antioxidant activity	molecular_function	9	9/2088	16	16/2423	0	0
GO:0045182	translation regulator activity	molecular_function	2	2/2088	7	7/2423	0	0
GO:0060089	molecular transducer activity	molecular_function	145	145/2088	156	156/2423	4	4/31
GO:0140110	transcription regulator activity	molecular_function	160	160/2088	205	205/2423	6	6/31
GO:0140299	small molecule sensor activity	molecular_function	2	2/2088	1	1/2423	0	0
GO:0044183	protein folding chaperone	molecular_function	1	1/2088	1	1/2423	0	0
