# Supplementary figures and images for: Multi-omics analysis reveals size-dependent toxicity and vascular endothelial cell injury induced by microplastic exposurein vivoandin vitro
Source: Royal Society of Chemistry journal article supplement (doi:10.1039/d1en01067k), 2021-12-22

### GO annotations analysis(Level 2)

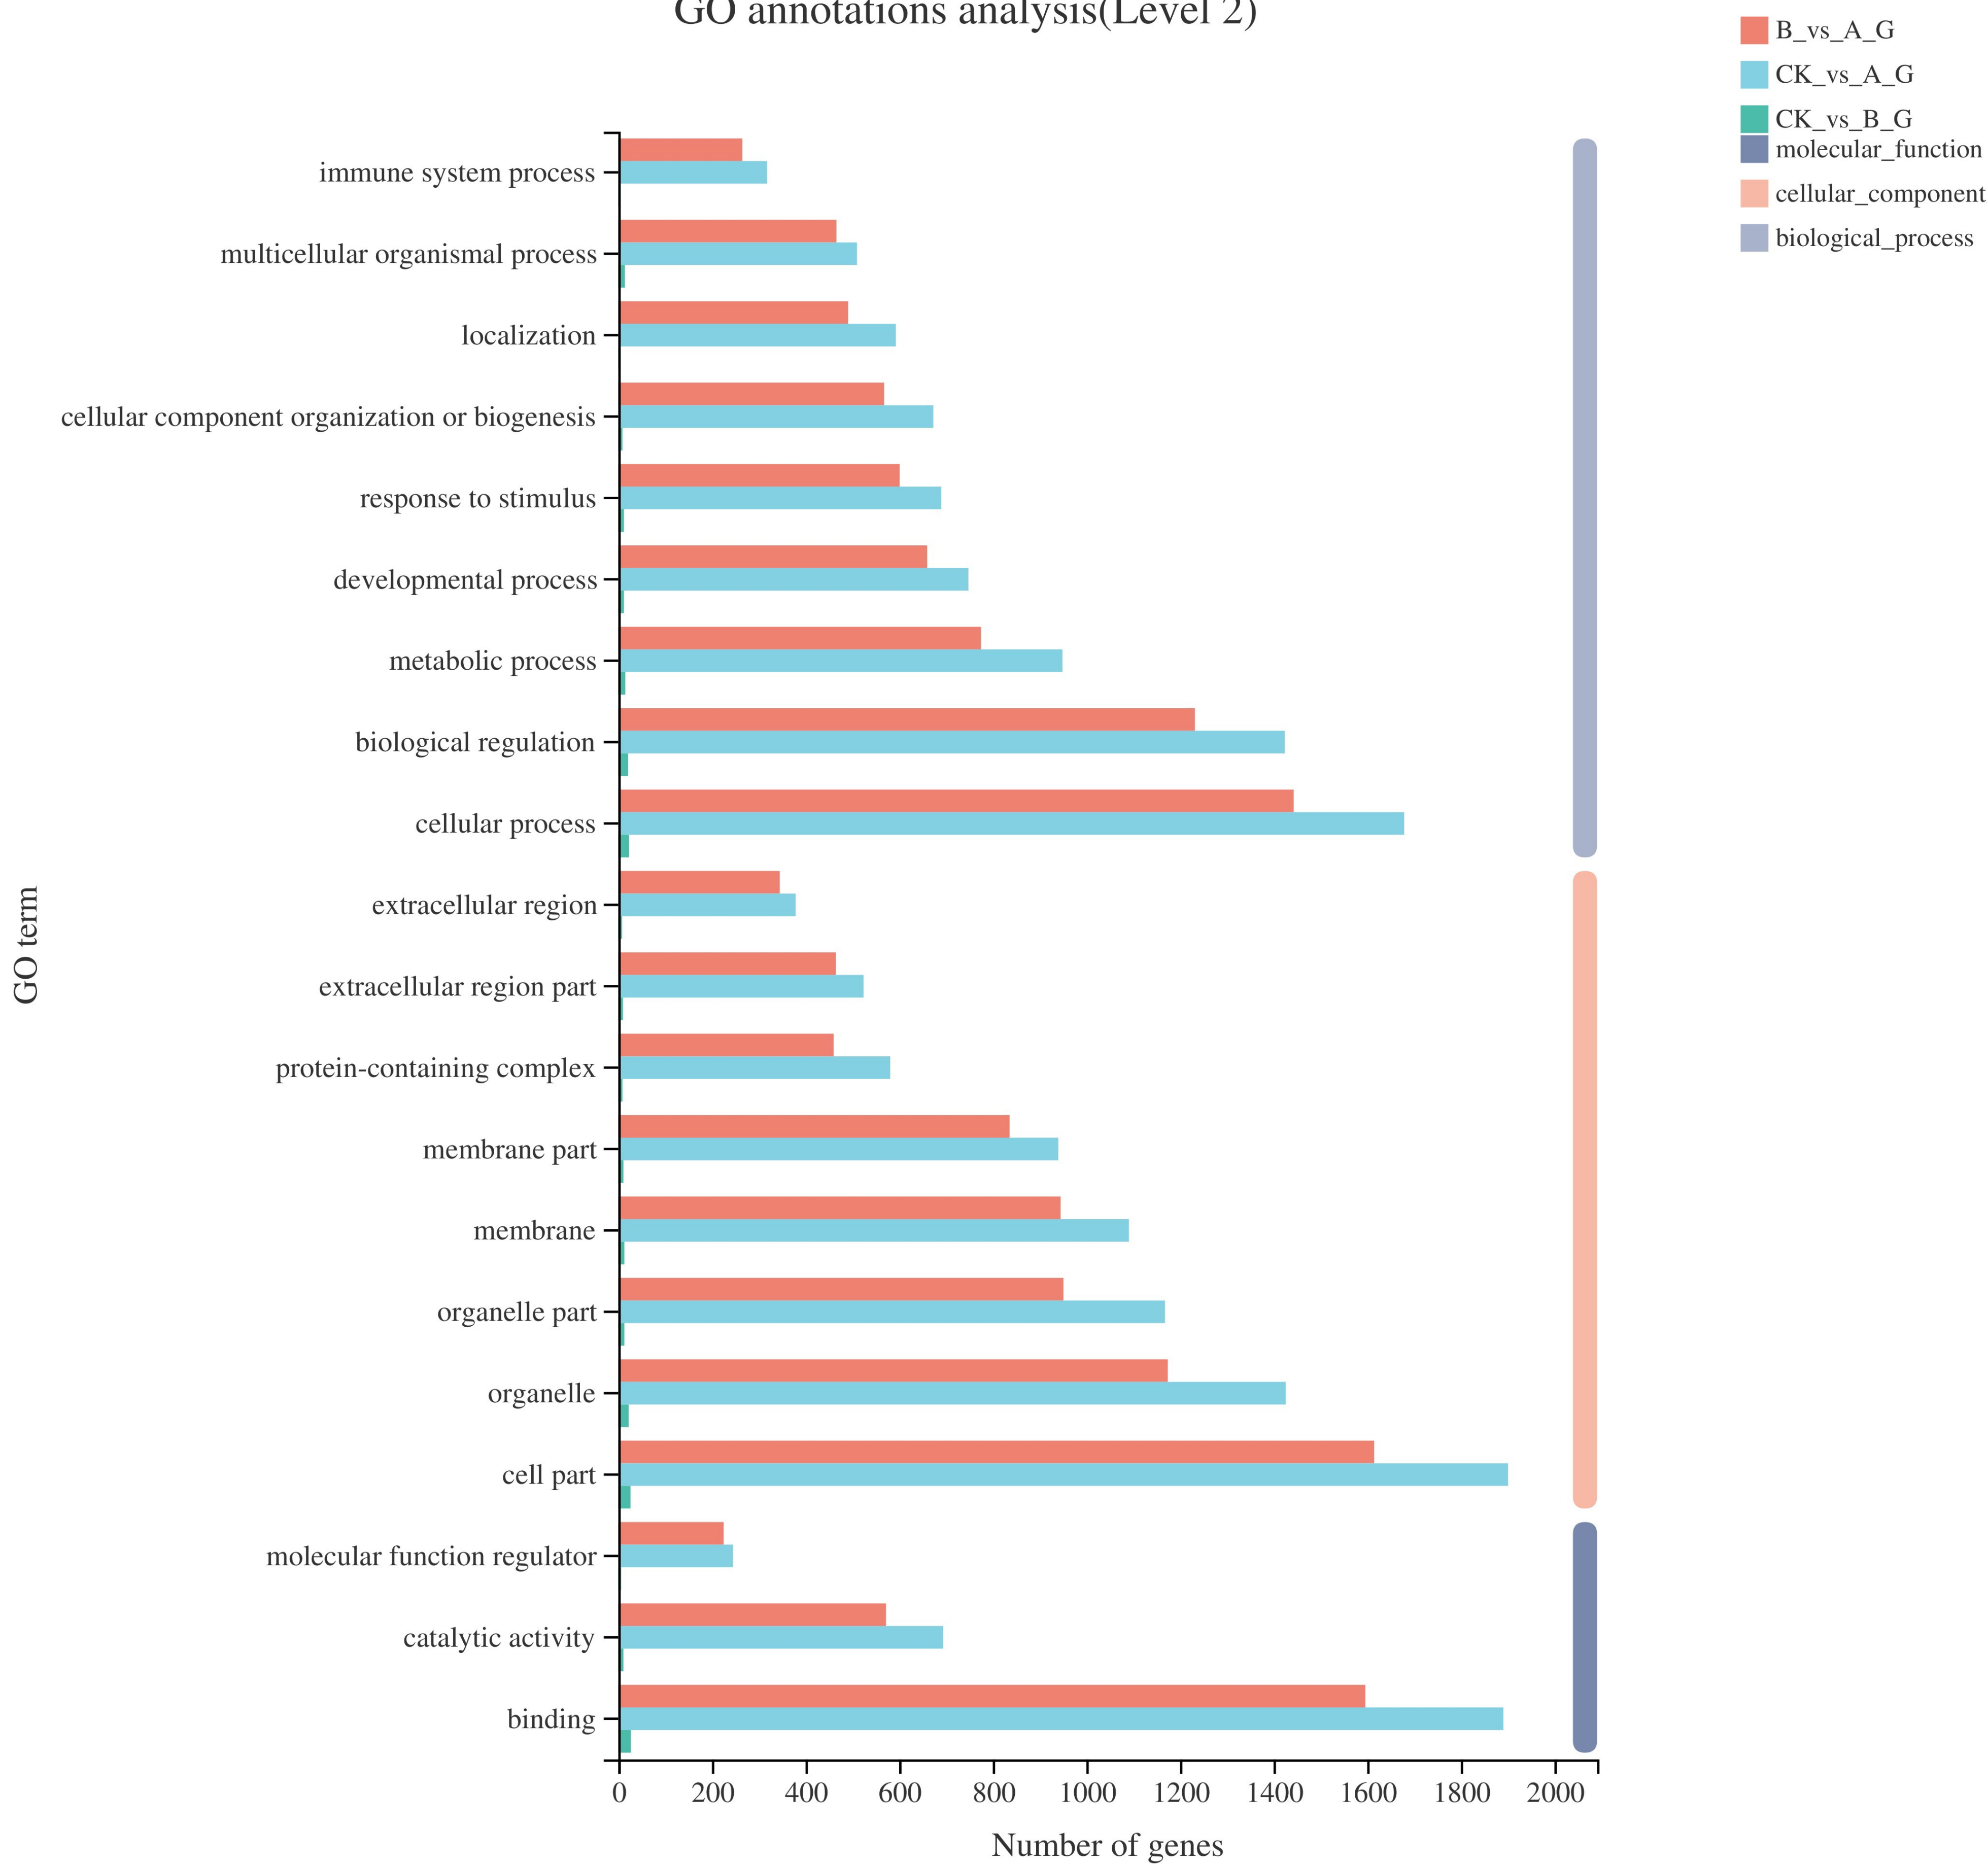

Supplement: d1en01067k1.pdf [file d1en01067k1.pdf]

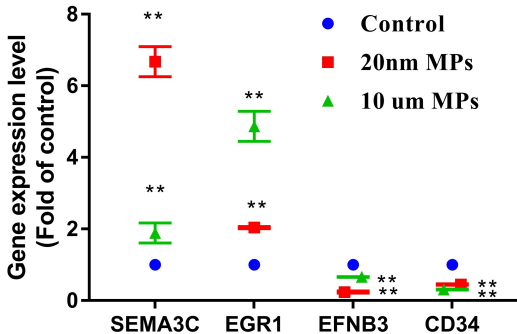

Supplement: d1en01067k2.pdf [file d1en01067k2.pdf]
